# Supplementary material for: Dapagliflozin alleviates diabetic kidney disease via HIF‐1α/HO1 mediated ferroptosis
Source: Research Square preprint supplement (doi:10.21203/rs.3.rs-1745222/v1), 2022-07-15

Table S1 Primers used in qRT-PCR

| Gene           | Primer Sequence 5' to 3'   |                             |
|----------------|----------------------------|-----------------------------|
|                | Forward                    | Reverse                     |
| HIF-1 $\alpha$ | 5'-ATCCATGTGACCATGAGGAAATG | 5'-TCGGCTAGTTAGGGTACACTTC   |
| FTH            | 5'-CCATCCAATCGGTAGTAGCG    | 5'-AGAACTACCACCAGGACTCAGAGG |
| TFRC           | 5'-TCGTGAGGCTGGATCTCAAAA   | 5'-CCTTACTATACGCCACATAACCC  |
| HO1            | 5'-AAGACTGCGTTCCTGCTCAAC   | 5'-AAAGCCCTACAGCAACTGTCG    |
| GPX4           | 5'-GGCTTCGTGTGCATCGTCACC   | 5'-TTCACCACGCAGCCGTTCTTG    |
| 18s            | 5'-GTAACCCGTTGAACCCCAT     | 5'-AGAACTACCACCAGGACTCAGAGG |

Table S2 General data of DKD patients

| Parameters                          | DKD patients        | Normal range                         |
|-------------------------------------|---------------------|--------------------------------------|
| Number of patients                  | 20                  | -                                    |
| Age, years                          | 52 ± 12.3           | -                                    |
| Gender, M/F                         | 14/6                | -                                    |
| Proteinuria, g/24h                  | 4.2 (2.8,7.1)       | <0.15                                |
| Scr, µmol/L                         | 248.7 (124.8,444.8) | 44~133                               |
| BUN, mmol/L                         | 14.3 (9.1,17.3)     | 2.86~7.14                            |
| eGFR, ml/min/1.73m <sup>2</sup>     | 22.1 (12.3,41.3)    | >90                                  |
| FBG, mmol/L                         | 6.5 (5.4,7.4)       | 3.9~6.1                              |
| HbA1c, %                            | 6.8 (6.1,8.0)       | 4~6                                  |
| Total cholesterol, mmol/L           | 4.9 (3.3,6.9)       | 2.33~5.17                            |
| Triglyceride, mmol/L                | 1.8 (1.3,2.3)       | 0.45~1.69                            |
| HDL-C, mmol/L                       | 1.0 (0.9,1.2)       | 1.16~1.42(male)<br>1.29~1.55(female) |
| LDL-C, mmol/L                       | 3.5 (2.0,4.4)       | 2.07~3.37                            |
| Percentage of glomerulosclerosis, % | 36.0 (23.8,53.1)    | -                                    |
| IFTA score, grade 0/1/2/3           | 0/0/8/12            | -                                    |

BUN, blood urea nitrogen; DKD, diabetic kidney disease; eGFR, estimated glomerular filtration rate; FBG, fasting blood glucose; HbA1c, hemoglobin A1c; HDL-C, high-density lipoprotein-cholesterol; IFTA, interstitial fibrosis and tubular atrophy; LDL-C, low-density lipoprotein-cholesterol; Scr, serum creatinine; TC, total cholesterol. The eGFR was calculated using the CKD-EPI equation. HbA1c levels

were measured using a high-performance liquid chromatographic assay. The continuous data were expressed as mean  $\pm$  SD or median and IQR as appropriate.

Fig.S1 KEGG pathway enrichment of differentially expressed genes. KEGG pathway enrichment of differentially expressed genes between *m/m* mice and vehicle-treated *db/db* mice (A) and vehicle-treated and dapagliflozin-treated *db/db* mice (B).

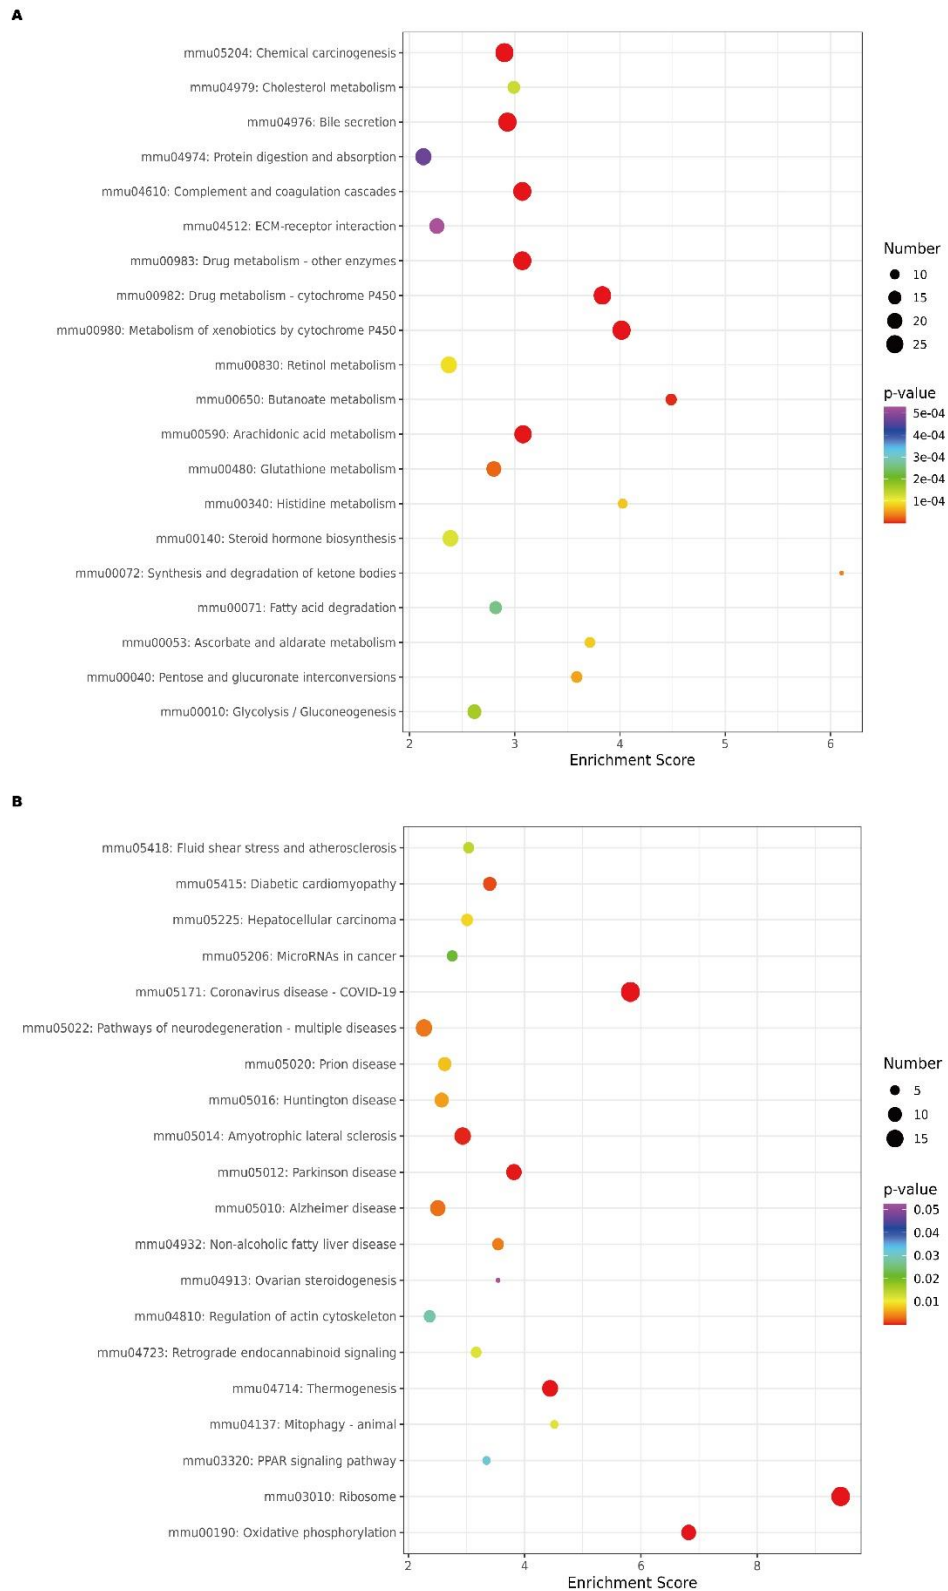

Fig.S2 The viability of HK-2 cells being cultured in the media with different treatments for 24h. Dapa, dapagliflozin. Data were expressed as mean  $\pm$  SD. \* $p$ <0.05, \*\* $p$ <0.01, \*\*\* $p$ <0.001.

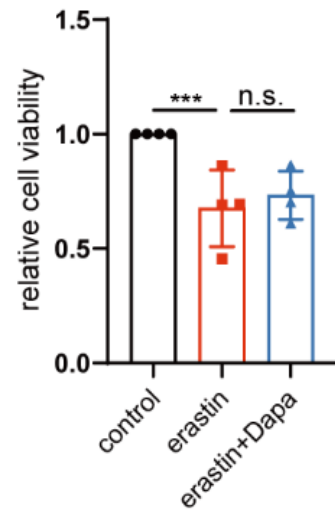

Supplement: Supplementary file 1 [file 242b9c830ca1475824cc773a.pdf]
